# Supplementary material
Source: PubMed Central journal article supplement (PMC2873054)
Supplement: NIHMS127857-supplement-supplementary_table.pdf [file NIHMS127857-supplement-supplementary_table.pdf]

**Supplemental Table:** Comparison of medical characteristics between risk groups related to vascular factors or estrogen replacement that might affect white matter. Frequencies did not differ between risk groups.

| <b>AD Risk</b> | <b>Smoke Current %</b> | <b>Smoke Past %</b> | <b>Pack-Years</b> | <b>HTN %</b> | <b>HyperChol</b> | <b>Diabetes %</b> | <b>ER Current %</b> | <b>ER Past %</b> |
|----------------|------------------------|---------------------|-------------------|--------------|------------------|-------------------|---------------------|------------------|
| High           | 4.3                    | 41.3                | 16.3<br>±5.0      | 40.5         | 21.2             | 4.8               | 39.0                | 33.3             |
| Low            | 2.4                    | 33.3                | 20.3<br>±7.1      | 59.1         | 33.3             | 4.3               | 50.0                | 21.4             |
| p-value        | 0.66                   | 0.58                | 0.64              | 0.16         | 0.75             | 0.94              | 0.40                | 0.42             |

*Percentages shown represent positive responses (present) to presence/absence of the characteristic named in each column. HTN – Hypertension; ER – estrogen replacement; HyperCho - hypercholesterolemia. "Smoke" refers to cigarette smoking: pack-years is the product of years smoked by packs smoked per day. P-values represent results of Pearson's test for categorical comparisons using Chi Square; t-test for Pack-Years.*
